# Supplementary material for: Genetic stability of Mycobacterium smegmatis under the stress of first-line antitubercular agents
Source: eLife. 2024 Nov 20;13:RP96695. doi: 10.7554/eLife.96695 (PMC11578590; doi:10.7554/eLife.96695)
Supplement: Figure 2—source data 2. [file elife-96695-fig2-data2.xlsx]

## Sheet: Munka1
treatment	strain	last growth conc. (ug/ml)	MIC	mean	sd					mean	sd	%	%sd
COMBO	Mock1	0.62	1.25	1.66667	0.721688				Mock	1.66667	0.721688	100	43.3013
	Mock2	0.62	1.25						COMBO	11.6667	7.63763	700	458.258
	Mock3	1.25	2.5						Mock	6.25	5.41266	100	86.6025
	COMBO1	5	10	11.6667	7.63763				INH	75	0	1200	0
	COMBO2	10	20						Mock	0.333333	0.144338	100	43.3013
	COMBO3	2.5	5						EMB	0.416667	0.144338	125	43.3013
INH	Mock1	0	9.375	15.625	5.41266				Mock	2.5	0.866025	100	34.641
	Mock2	9.375	18.75						RIF	7	4.58258	280	183.303
	Mock3	9.375	18.75						Mock	0.01	0	100	0
	INH1	75	150	150	0				MMC	0.04	0	400	0
	INH2	75	150						Mock	0.1	0.0866025	100	86.6025
	INH3	75	150						CIP	1.2	0	1200	0
EMB	Mock1	0.5	1	0.666667	0.288675
	Mock2	0.25	0.5
	Mock3	0.25	0.5
	EMB1	0.5	1	0.833333	0.288675
	EMB2	0.5	1
	EMB3	0.25	0.5
RIF	Mock1	3	6	5	1.73205
	Mock2	1.5	3
	Mock3	3	6
	RIF1	12	24	14	9.16515
	RIF2	6	12
	RIF3	3	6
MMC	Mock1	0.01	0.02	0.02	0
	Mock2	0.01	0.02
	Mock3	0.01	0.02
	MMC1	0.04	0.08	0.08	0
	MMC2	0.04	0.08
	MMC3	0.04	0.08
CIP	Mock1	0	0.15	0.25	0.0866025
	Mock2	0.15	0.3
	Mock3	0.15	0.3
	CIP1	1.2	2.4	2.4	0
	CIP2	1.2	2.4
	CIP3	1.2	2.4
